# Supplementary material for: Transcriptional analysis of multiple ovarian cancer cohorts reveals prognostic and immunomodulatory consequences of ERV expression
Source: HighWire-hosted journal article supplement (doi:10.1136/jitc-2020-001519), 2021-01-01

| Number of ERV repeats analysed | Number of ERV repeats associated with survival advantage | Number of ERV repeats associated with survival disadvantage | Number of ERV families associated with survival advantage | Number of ERV families associated with survival disadvantage | Number of ERV families exclusively associated with survival advantage | Number of ERV families exclusively associated with survival disadvantage |
|--------------------------------|----------------------------------------------------------|-------------------------------------------------------------|-----------------------------------------------------------|--------------------------------------------------------------|-----------------------------------------------------------------------|--------------------------------------------------------------------------|
| 25,207                         | 226                                                      | 272                                                         | 115                                                       | 132                                                          | 59                                                                    | 76                                                                       |

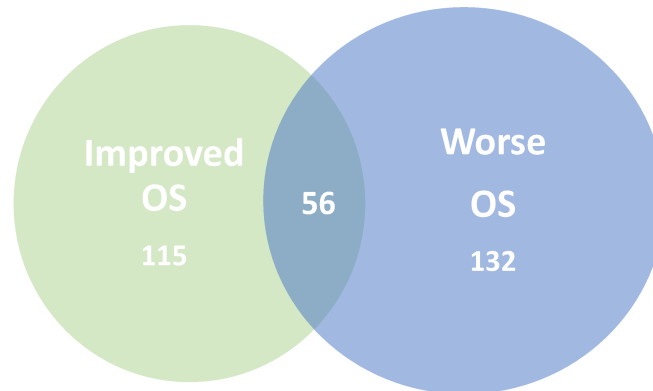

Supplement: jitc-2020-001519supp003_data_supplement.pdf [file jitc-2020-001519supp003_data_supplement.pdf]
