# Supplementary figures and images for: Transcriptional analysis of multiple ovarian cancer cohorts reveals prognostic and immunomodulatory consequences of ERV expression
Source: HighWire-hosted journal article supplement (doi:10.1136/jitc-2020-001519), 2021-01-01

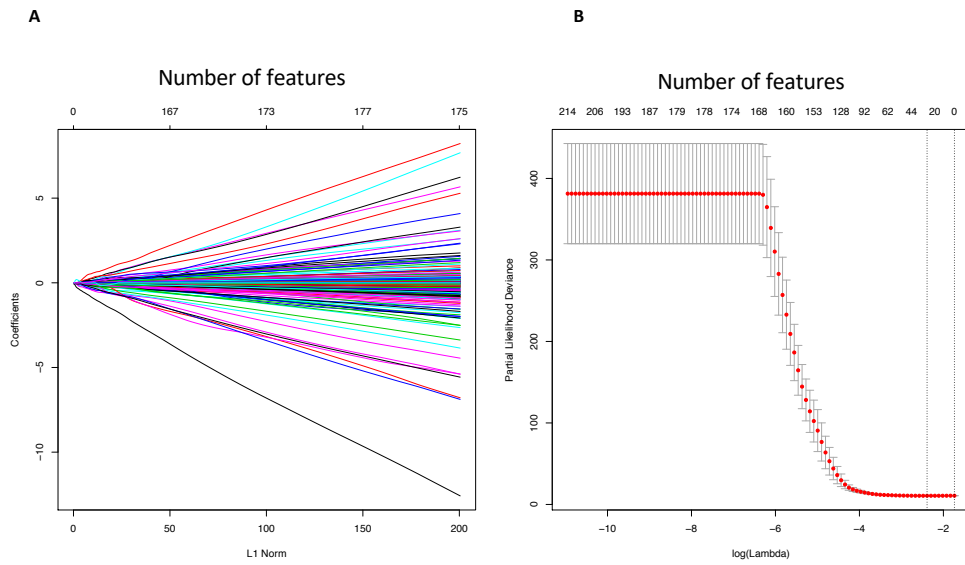

Supplement: jitc-2020-001519supp005_data_supplement.pdf [file jitc-2020-001519supp005_data_supplement.pdf]

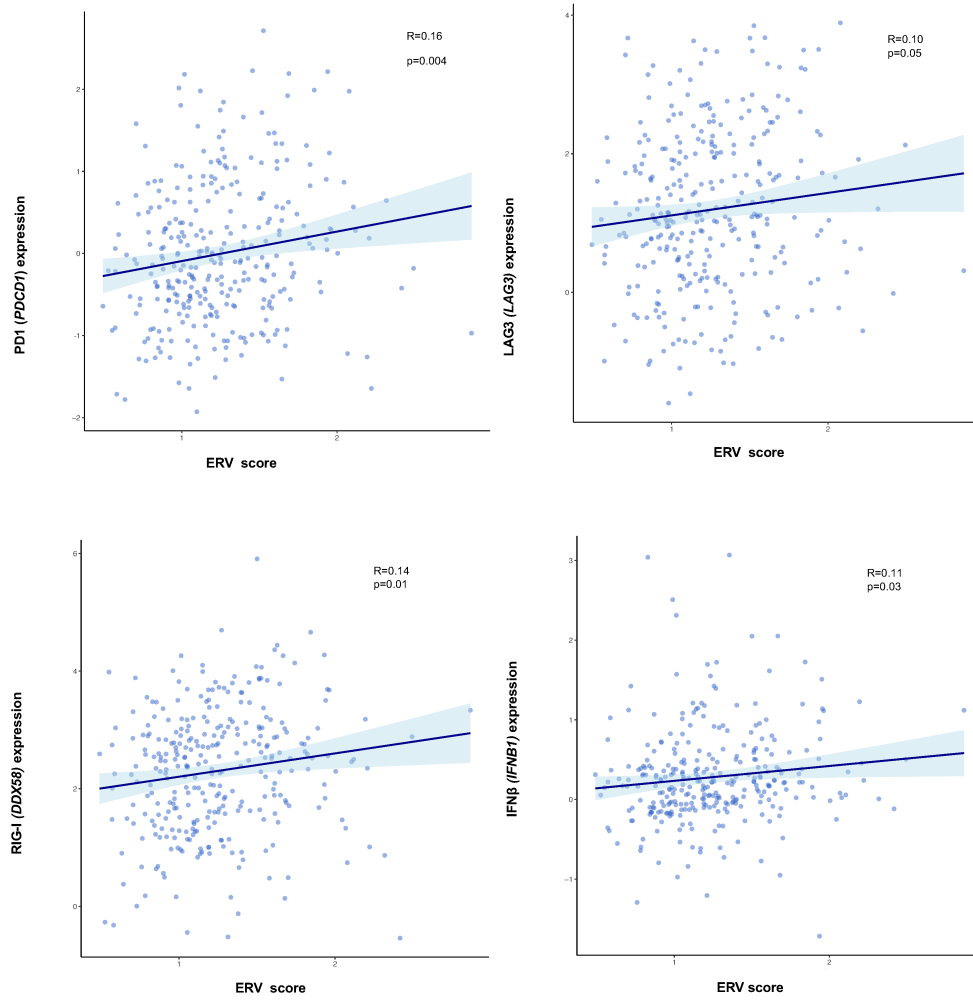

Supplement: jitc-2020-001519supp008_data_supplement.pdf [file jitc-2020-001519supp008_data_supplement.pdf]

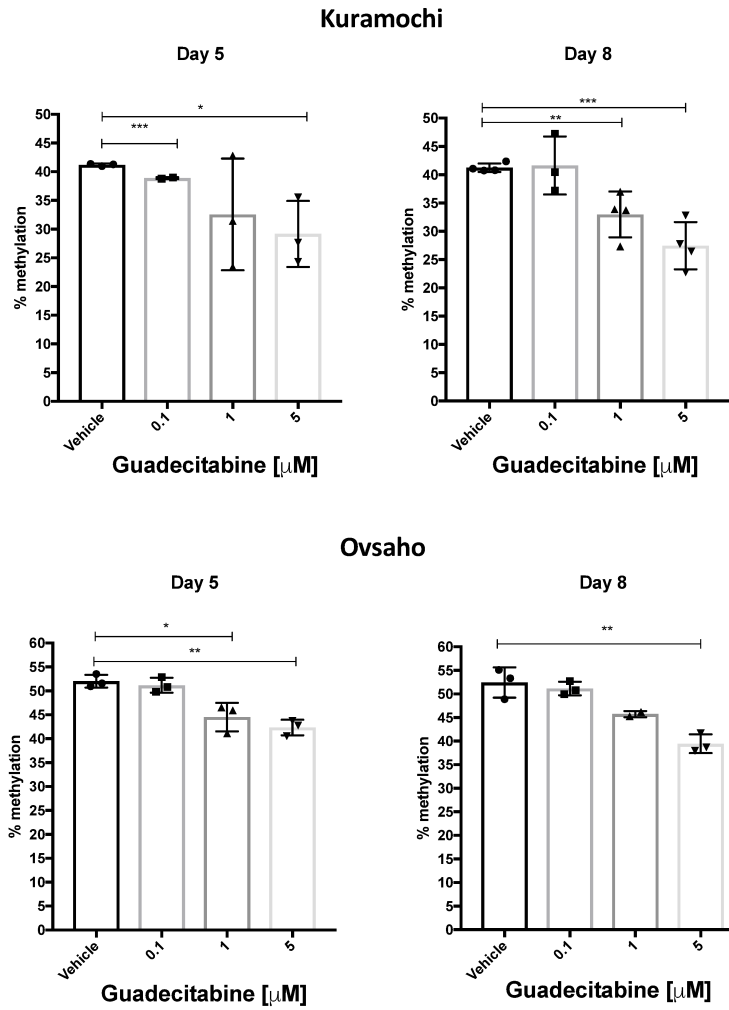

Supplement: jitc-2020-001519supp009_data_supplement.pdf [file jitc-2020-001519supp009_data_supplement.pdf]

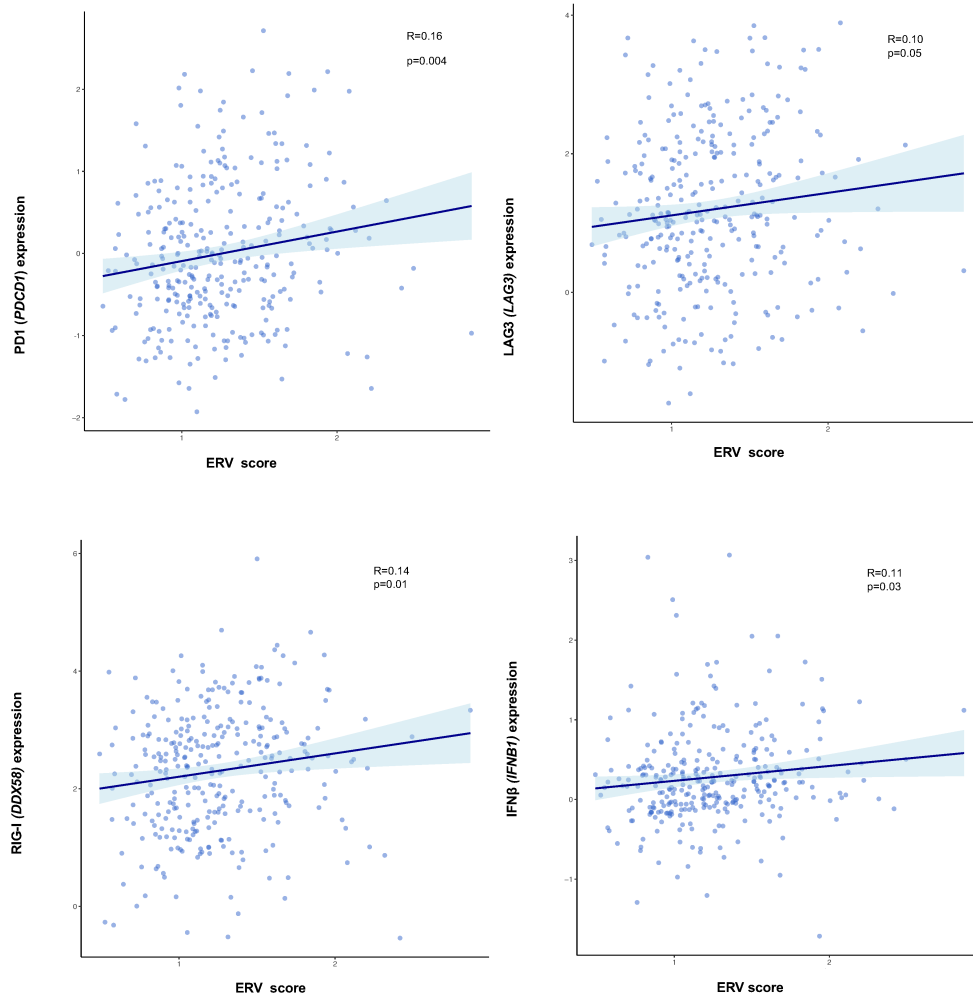

Supplement: jitc-2020-001519supp008_data_supplement.pdf [file jitc-2020-001519supp008_data_supplement.pdf]

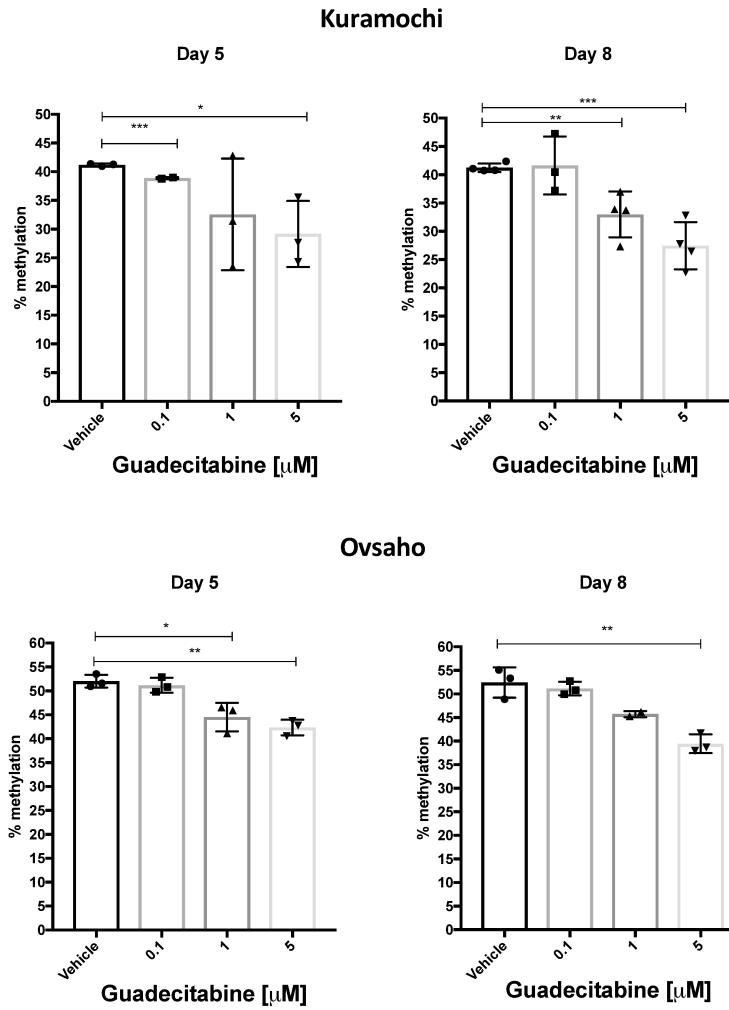

Supplement: jitc-2020-001519supp009_data_supplement.pdf [file jitc-2020-001519supp009_data_supplement.pdf]
